# Supplementary material
Source: HighWire-hosted journal article supplement (https://cmajopen.ca/highwire/filestream/81096/field_highwire_adjunct_files/3/reviewer-comments-2017-0161.pdf)
Supplement: reviewer-comments-2017-0161.pdf [file reviewer-comments-2017-0161.pdf]

| <b>Article details: 2017-0161</b>          |                                                                                                                                                                                                                                                                                                                                                                                                                                                                                                                                                                                                                                                                                                                                                                                                                                                                                                                                                                                                                                                                                                                                                                                                                                                                                                                                                                                                                                                                                                                                                                                                                                                                                                                                                                                                                                                                                                                                                                                                                                                                                                                                                                                                                                                                                                                                                                                                                                                                                                                                                                                                                                                                                                                                                                                                        |
|--------------------------------------------|--------------------------------------------------------------------------------------------------------------------------------------------------------------------------------------------------------------------------------------------------------------------------------------------------------------------------------------------------------------------------------------------------------------------------------------------------------------------------------------------------------------------------------------------------------------------------------------------------------------------------------------------------------------------------------------------------------------------------------------------------------------------------------------------------------------------------------------------------------------------------------------------------------------------------------------------------------------------------------------------------------------------------------------------------------------------------------------------------------------------------------------------------------------------------------------------------------------------------------------------------------------------------------------------------------------------------------------------------------------------------------------------------------------------------------------------------------------------------------------------------------------------------------------------------------------------------------------------------------------------------------------------------------------------------------------------------------------------------------------------------------------------------------------------------------------------------------------------------------------------------------------------------------------------------------------------------------------------------------------------------------------------------------------------------------------------------------------------------------------------------------------------------------------------------------------------------------------------------------------------------------------------------------------------------------------------------------------------------------------------------------------------------------------------------------------------------------------------------------------------------------------------------------------------------------------------------------------------------------------------------------------------------------------------------------------------------------------------------------------------------------------------------------------------------------|
| Title                                      | Cancer drug expenditure in British Columbia and Saskatchewan: a trend analysis                                                                                                                                                                                                                                                                                                                                                                                                                                                                                                                                                                                                                                                                                                                                                                                                                                                                                                                                                                                                                                                                                                                                                                                                                                                                                                                                                                                                                                                                                                                                                                                                                                                                                                                                                                                                                                                                                                                                                                                                                                                                                                                                                                                                                                                                                                                                                                                                                                                                                                                                                                                                                                                                                                                         |
| Authors                                    | Reka Pataky MSc, David A. Tran MA, Andrea Coronado MSc, Riaz Alvi MSc, Darryl Boehm BSP, Dean A. Regier PhD, Stuart Peacock DPhil                                                                                                                                                                                                                                                                                                                                                                                                                                                                                                                                                                                                                                                                                                                                                                                                                                                                                                                                                                                                                                                                                                                                                                                                                                                                                                                                                                                                                                                                                                                                                                                                                                                                                                                                                                                                                                                                                                                                                                                                                                                                                                                                                                                                                                                                                                                                                                                                                                                                                                                                                                                                                                                                      |
| <b>Reviewer 1</b>                          | Nancy Nixon                                                                                                                                                                                                                                                                                                                                                                                                                                                                                                                                                                                                                                                                                                                                                                                                                                                                                                                                                                                                                                                                                                                                                                                                                                                                                                                                                                                                                                                                                                                                                                                                                                                                                                                                                                                                                                                                                                                                                                                                                                                                                                                                                                                                                                                                                                                                                                                                                                                                                                                                                                                                                                                                                                                                                                                            |
| Institution                                | Tom Baker Cancer Centre, Calgary, Alta.                                                                                                                                                                                                                                                                                                                                                                                                                                                                                                                                                                                                                                                                                                                                                                                                                                                                                                                                                                                                                                                                                                                                                                                                                                                                                                                                                                                                                                                                                                                                                                                                                                                                                                                                                                                                                                                                                                                                                                                                                                                                                                                                                                                                                                                                                                                                                                                                                                                                                                                                                                                                                                                                                                                                                                |
| General comments (author response in bold) | <p>Interesting article. A couple of issues:</p> <p>1) Introduction: Clarify funding structures in SK and BC. Is there universal coverage for all cancer agents? I found this confusing. <b>We have provided additional information in the second paragraph of the introduction (page 3) and added references to program information from BC Cancer and the Saskatchewan Cancer Agency (references 12 and 13).</b></p> <p>2) Could there be a better explanation of how age and population growth were adjusted for? Maybe just an extra sentence. <b>An additional description of the adjustment method was included in the Methods section (page 5).</b></p> <p>3) Re-read and make sure all sentences make sense and no grammatical errors. <b>We have reviewed and edited the paper as suggested.</b></p>                                                                                                                                                                                                                                                                                                                                                                                                                                                                                                                                                                                                                                                                                                                                                                                                                                                                                                                                                                                                                                                                                                                                                                                                                                                                                                                                                                                                                                                                                                                                                                                                                                                                                                                                                                                                                                                                                                                                                                                           |
| <b>Reviewer 2</b>                          | Christopher Longo                                                                                                                                                                                                                                                                                                                                                                                                                                                                                                                                                                                                                                                                                                                                                                                                                                                                                                                                                                                                                                                                                                                                                                                                                                                                                                                                                                                                                                                                                                                                                                                                                                                                                                                                                                                                                                                                                                                                                                                                                                                                                                                                                                                                                                                                                                                                                                                                                                                                                                                                                                                                                                                                                                                                                                                      |
| Institution                                | DeGroote School of Business, McMaster University, Hamilton, Ont.                                                                                                                                                                                                                                                                                                                                                                                                                                                                                                                                                                                                                                                                                                                                                                                                                                                                                                                                                                                                                                                                                                                                                                                                                                                                                                                                                                                                                                                                                                                                                                                                                                                                                                                                                                                                                                                                                                                                                                                                                                                                                                                                                                                                                                                                                                                                                                                                                                                                                                                                                                                                                                                                                                                                       |
| General comments (author response in bold) | <p>Overall this is a well written paper, with both clear methods and results. I found a few places where the conclusions did not match well with the finding, but otherwise I think this work provides a valuable contribution to the literature</p> <p>Specific comments</p> <p>Abstract (page 2; p 9 of 28)</p> <p>Paragraph 3, line 24-25 - Missing % after 9.2<br/><b>We have added the missing % sign.</b></p> <p>Paragraph 4, line 32-33 - I find this conclusion inappropriate/difficult to interpret. In fact I prefer the line provided at the end of the discussion (page 10; p17 of 28, line 27-29). OR perhaps change to "Understanding the recent trends in systemic therapy is an important first step...."</p> <p><b>We have updated the conclusion of the abstract (page 2) to be more consistent with the results and interpretation presented in the paper.</b></p> <p>Introduction (page 3; p 10 of 28)</p> <p>First paragraph, line 25-32 – This reads as a conclusion, so more suited to the discussion OR don't present as a conclusion in the introduction.<br/><b>We have restructured the Introduction to remove this statement (page 3, first paragraph), and to strengthen the rationale for this study.</b></p> <p>Methods (page 4; p 11 of 28)</p> <p>First paragraph, line 26 – "Supportive care drugs were not included in the analysis" How was this defined? Is appropriate to provide a list of drug classes that are excluded e.g. are anti-emetics classified as supportive care?<br/><b>We have added a line to the first paragraph of the Methods section (page 4) to clarify that we used each pharmacy's own classification to define supportive care drugs.</b></p> <p>Results (page 6; p 13-28)</p> <p>Second paragraph, line 17-18 – several typos remove "in" between expenditure and rose and add % to 9.2<br/><b>We have addressed the typos</b></p> <p>Interpretation (page 8; p 15 of 28)</p> <p>First paragraph line 23-26 -What is your justification for saying "this is not a function of improved tolerability" Please expand.<br/><b>We have expanded this section to clarify what we originally meant by this statement, interpreting the age-specific trends in utilization (page 9). If oral drugs are generally more tolerable and less toxic we might expect greater uptake in the older, more frail patient groups, but we did not observe this in the data.</b></p> <p>Page 9; p16 of 28</p> <p>First paragraph, line 32-33 – Please provide a brief explanation/definition of joinpoint analysis Page 10; p17 of 28<br/><b>We have added a short definition of joinpoint (segmented regression) analysis (page 11).</b></p> <p>Last paragraph, line 22 – typo "drives" should read "drivers"<br/><b>We have addressed this typo.</b></p> |
| <b>Reviewer 3</b>                          | Karen Lee                                                                                                                                                                                                                                                                                                                                                                                                                                                                                                                                                                                                                                                                                                                                                                                                                                                                                                                                                                                                                                                                                                                                                                                                                                                                                                                                                                                                                                                                                                                                                                                                                                                                                                                                                                                                                                                                                                                                                                                                                                                                                                                                                                                                                                                                                                                                                                                                                                                                                                                                                                                                                                                                                                                                                                                              |
| Institution                                | CADTH, CDR, Ottawa, Ont.                                                                                                                                                                                                                                                                                                                                                                                                                                                                                                                                                                                                                                                                                                                                                                                                                                                                                                                                                                                                                                                                                                                                                                                                                                                                                                                                                                                                                                                                                                                                                                                                                                                                                                                                                                                                                                                                                                                                                                                                                                                                                                                                                                                                                                                                                                                                                                                                                                                                                                                                                                                                                                                                                                                                                                               |
| General comments (author response in bold) | <p>Interesting paper. Additional details on the analyses as well as the interpretation of the results would be helpful to understand how this research might guide further research. Also highlighting some of the results would further add to the paper.<br/><b>The manuscript has been edited extensively to address the above comments, and to improve clarity and interpretation of results.</b></p>                                                                                                                                                                                                                                                                                                                                                                                                                                                                                                                                                                                                                                                                                                                                                                                                                                                                                                                                                                                                                                                                                                                                                                                                                                                                                                                                                                                                                                                                                                                                                                                                                                                                                                                                                                                                                                                                                                                                                                                                                                                                                                                                                                                                                                                                                                                                                                                              |
